# Supplementary material for: Development of an enzyme immunoassay for detection of antibodies against Coccidioides in dogs and other mammalian species
Source: PLoS One. 2017 Apr 5;12(4):e0175081. doi: 10.1371/journal.pone.0175081 (PMC5381914; doi:10.1371/journal.pone.0175081)
Supplement: S3 Data — (XLSX) [file pone.0175081.s003.xlsx]

## Sheet: Sheet1
Donor ID	CDC ID	Cocci EIA values	Cocci result	Histo result	Blasto result
1	3000145348	0.533708	Negative	Positive	Negative
2	3000145349	1.02809	Negative	Positive	Negative
3	3000145350	0.393258	Negative	Positive	Negative
4	3000145351	0.61236	Negative	Positive	Negative
5	3000145352	0.831461	Negative	Positive	Negative
6	3000145353	0.589888	Negative	Positive	Negative
7	3000145354	0.219101	Negative	Positive	Negative
8	3000145355	16.0787	Positive	Positive	Negative
9	3000145356	0.286517	Negative	Positive	Negative
10	3000145357	0.438202	Negative	Positive	Negative
11	3000145358	0.848315	Negative	Negative	Positive
12	3000145359	1.18539	Negative	Negative	Positive
13	3000145360	0.202247	Negative	Negative	Positive
14	3000145361	0.438202	Negative	Negative	Positive
15	3000145362	0.0561798	Negative	Negative	Positive
16	3000145363	0.359551	Negative	Negative	Positive
17	3000145096	0.775281	Negative	Negative	Positive
18	3000145097	0.230337	Negative	Negative	Positive
19	3000145098	0.308989	Negative	Negative	Positive
20	3000145099	0.47191	Negative	Negative	Positive
